# Supplementary material for: MoO3 Nanoparticle Coatings on High-Voltage 5 V LiNi0.5Mn1.5O4 Cathode Materials for Improving Lithium-Ion Battery Performance
Source: MDPI journal article supplement (doi:10.3390/nano12030409), 2022-01-26
Supplement: s1 [file s1]

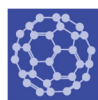

## Article

# MoO<sub>3</sub> Nanoparticle Coatings on High-Voltage 5 V LiNi<sub>0.5</sub>Mn<sub>1.5</sub>O<sub>4</sub> Cathode Materials for Improving Lithium-Ion Battery Performance

Zong-Han Wu<sup>1</sup>, Jeng-Ywan Shih<sup>2</sup>, Ying-Jeng James Li<sup>1,2</sup>, Yi-De Tsai<sup>1</sup>, Tai-Feng Hung<sup>1</sup>, Chelladurai Karuppiah<sup>1,\*</sup>, Rajan Jose<sup>3</sup> and Chun-Chen Yang<sup>1,2,4,\*</sup>

<sup>1</sup> Battery Research Center of Green Energy, Ming Chi University of Technology, New Taipei City 24301, Taiwan; smartindigoboy@gmail.com (Z.-H.W.); yjli@mail.mcut.edu.tw (Y.-J.J.L.); d1161p002@mail.mcut.edu.tw (Y.-D.T.); taifeng@mail.mcut.edu.tw (T.-F.H.)

<sup>2</sup> Department of Chemical Engineering, Ming Chi University of Technology, New Taipei City 24301, Taiwan; drexel@mail.mcut.edu.tw

<sup>3</sup> Nanostructured Renewable Energy Materials Laboratory, Faculty of Industrial Sciences and Technology, University Malaysia Pahang, Kuantan 26300, Malaysia; rjose@ump.edu.my

<sup>4</sup> Department of Chemical and Materials Engineering, and Green Technology Research Center, Chang Gung University, Taoyuan City 333, Taiwan

\* Correspondence: kcdurai.rmd@gmail.com (C.K.); ccyang@mail.mcut.edu.tw (C.-C.Y.)

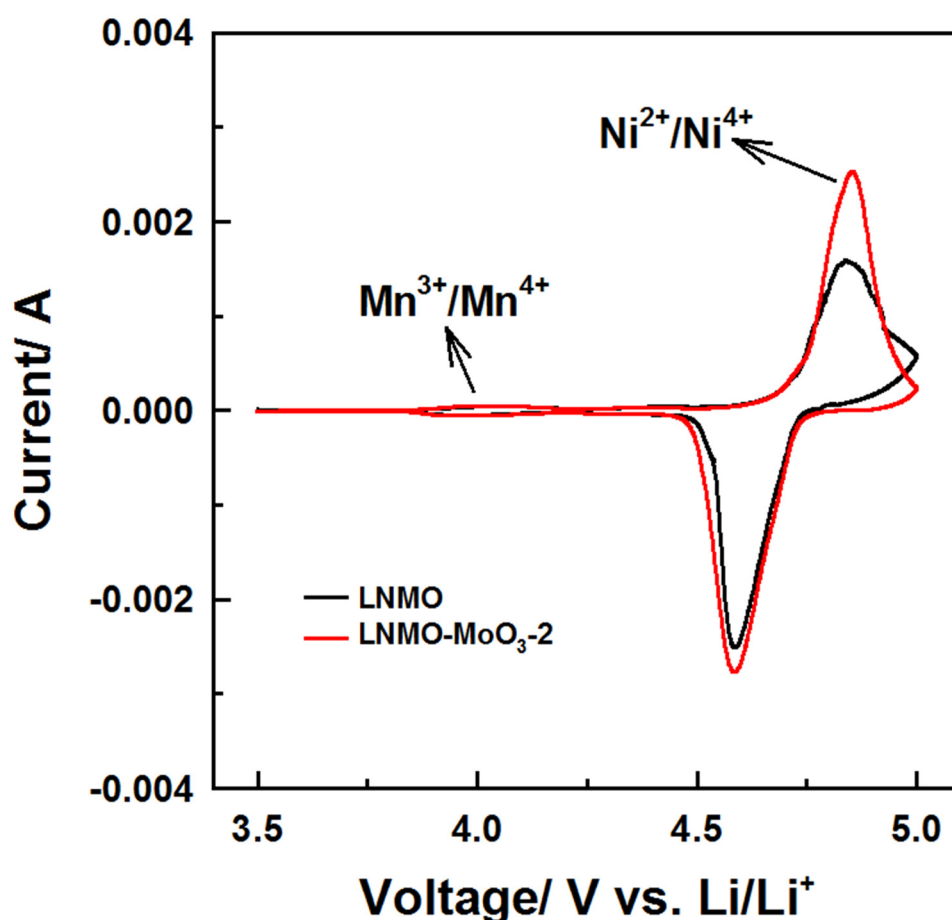

**Figure S1.** Cyclic voltamograms of LNMO and LNMO-MoO<sub>3</sub>-2 electrodes at a scan rate of 0.1 mV s<sup>-1</sup>.

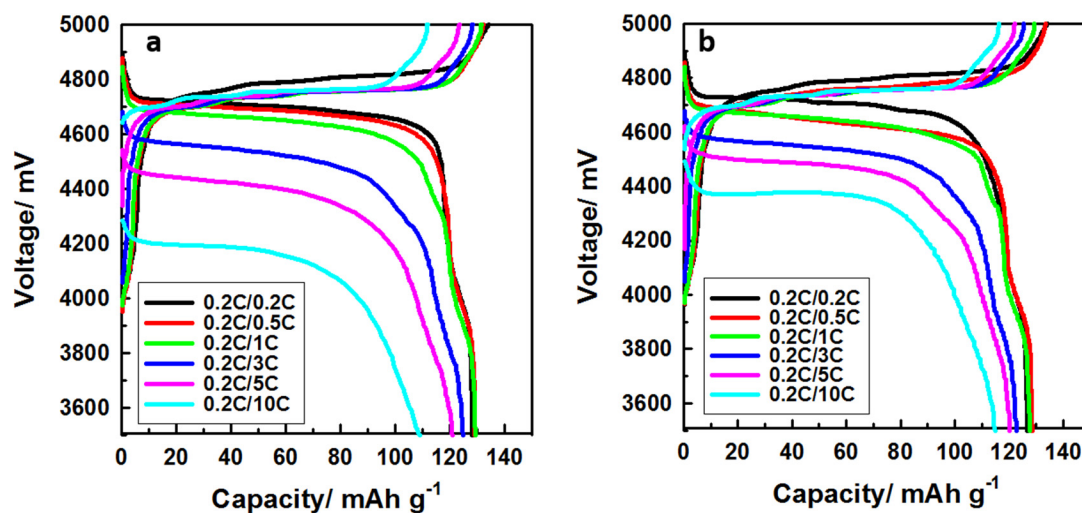

**Figure S2.** Charge-discharge curves of pristine LNMO-MoO<sub>3</sub>-1 (a) and LNMO-MoO<sub>3</sub>-3 (b) electrodes at 0.2–10 C.

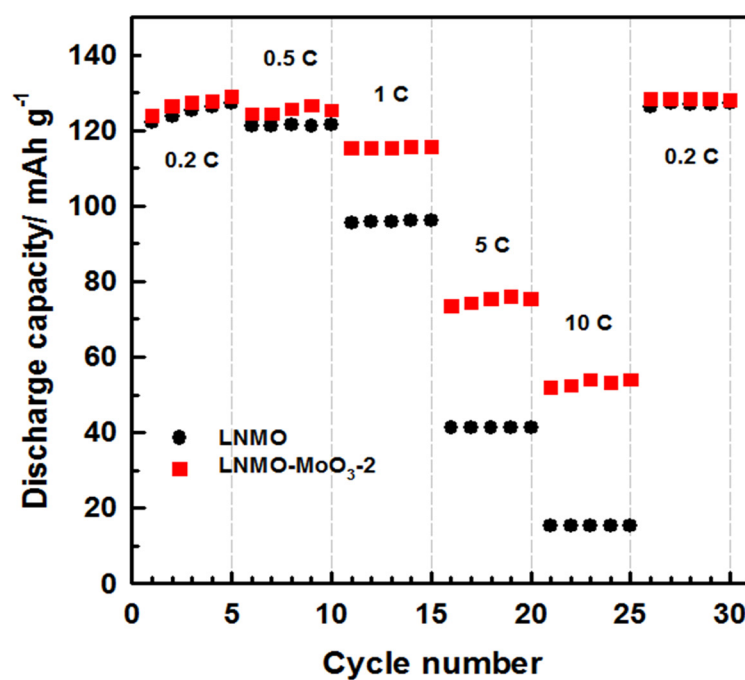

**Figure S3.** Rate profiles of pristine LNMO and LNMO-MoO<sub>3</sub>-2 electrodes at 0.2C/0.2C–10C/10C rate.

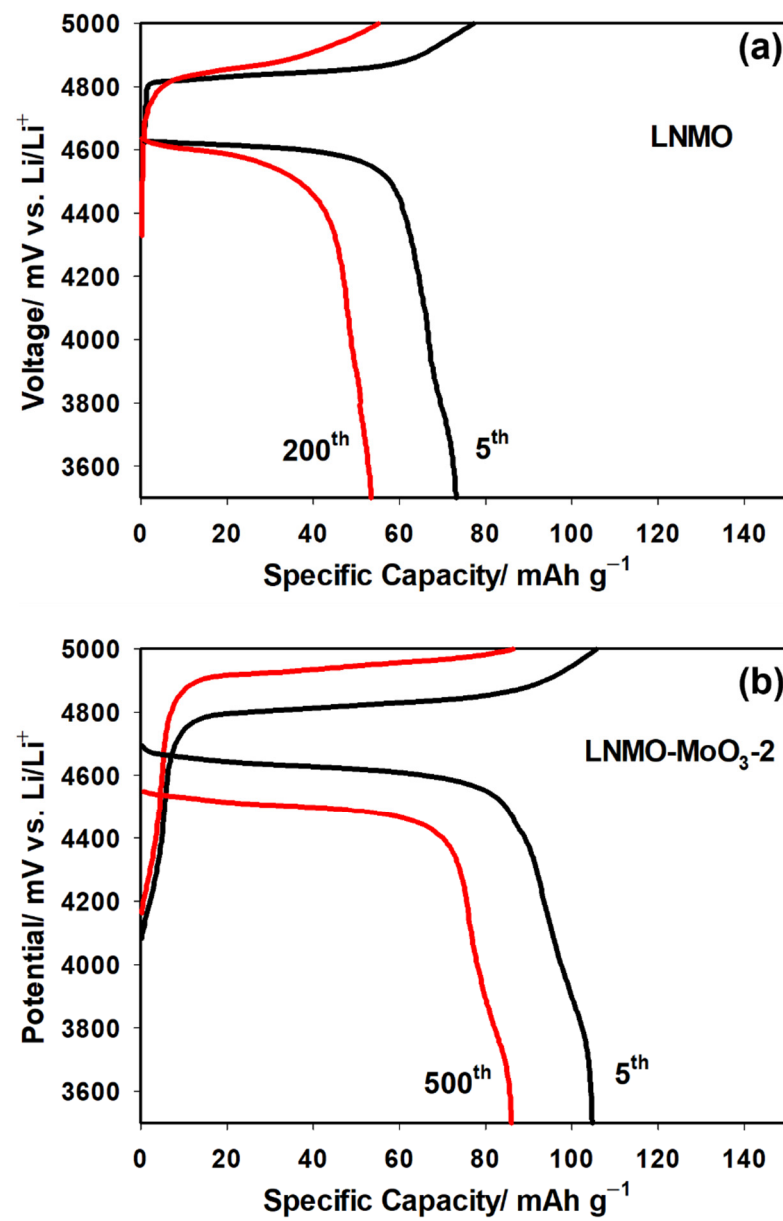

Figure S4. Charge-discharge cycles of LNMO and LNMO-MoO<sub>3</sub>-2 electrodes.

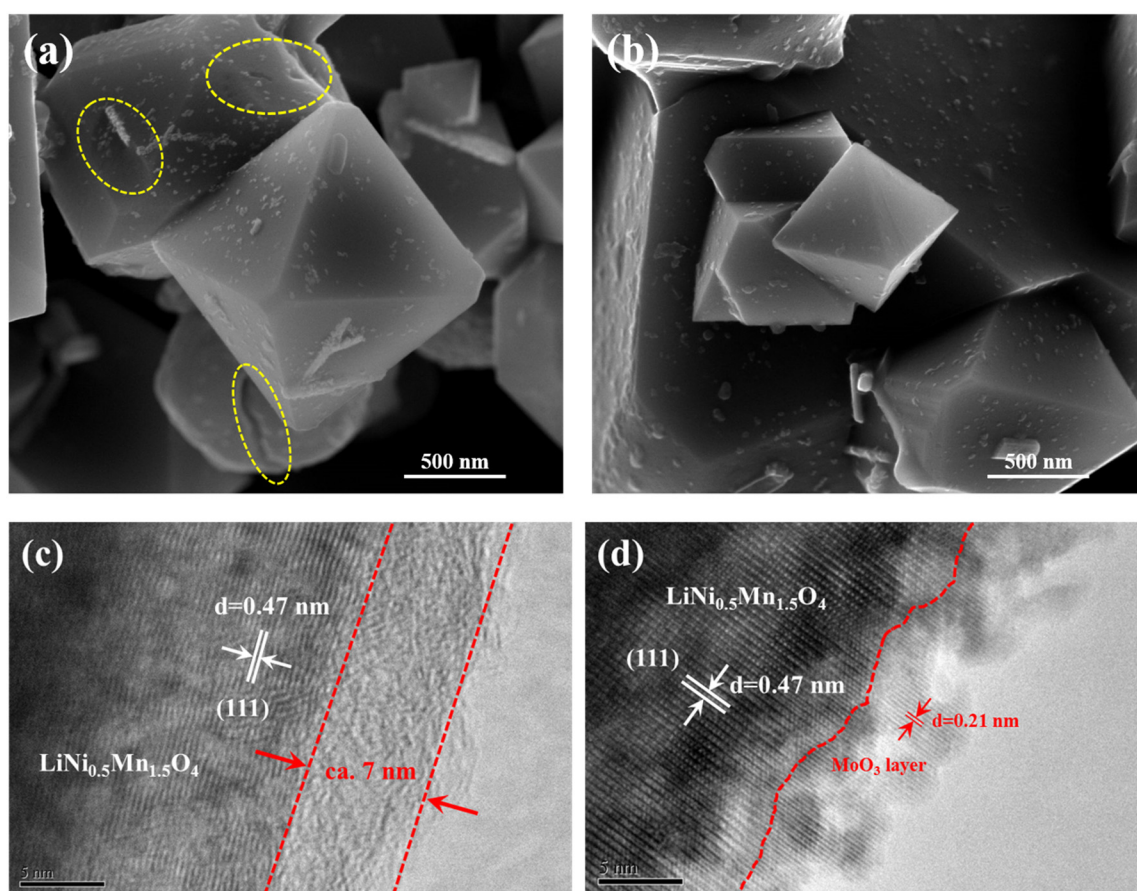

**Figure S5.** FESEM (a,b) and HRTEM (c,d) images of LNMO (left) and LNMO-MoO<sub>3</sub>-2 (right) electrodes after 1C/10C rate performance for 500 cycles.

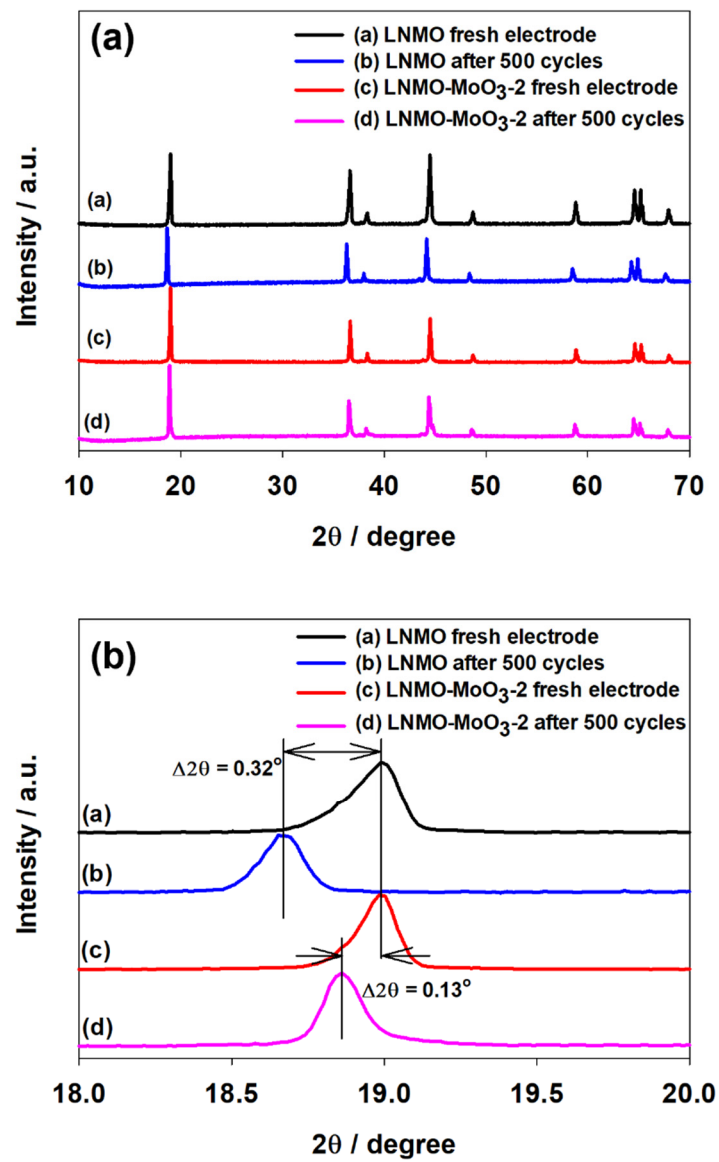

**Figure S6.** XRD pattern of pristine LNMO and LNMO-MoO<sub>3</sub>-2 electrode in fresh and after 500 cycles at 10C rate.

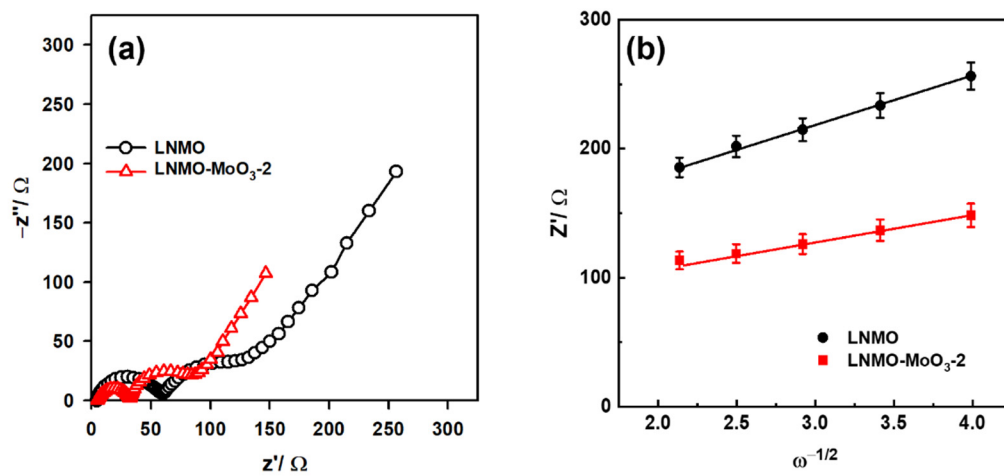

**Figure S7.** (a) EIS and (b)  $Z'$  vs.  $\omega^{-1/2}$  plot of LNMO and LNMO-MoO<sub>3</sub>-2 electrodes after 5 cycles at 0.1C rate.

**Table S1.** EIS fitting results for LNMO and LNMO-MoO<sub>3</sub>-2 electrodes after 5 cycles at 0.1C rate.

| Sample                   | $R_b/\Omega$ | $R_{SEI}/\Omega$ | $R_{ct}/\Omega$ | $D_{Li^+}/\text{cm}^2\text{ s}^{-1}$ |
|--------------------------|--------------|------------------|-----------------|--------------------------------------|
| LNMO                     | 4.30         | 55.13            | 67.08           | $2.52 \times 10^{-14}$               |
| LNMO-MoO <sub>3</sub> -2 | 5.13         | 27.23            | 52.74           | $9.61 \times 10^{-14}$               |
